# Supplementary material for: QTL-Seq and Transcriptome Analysis Disclose Major QTL and Candidate Genes Controlling Leaf Size in Sesame (Sesamum indicum L.)
Source: Front Plant Sci. 2021 Feb 24;12:580846. doi: 10.3389/fpls.2021.580846 (PMC7943740; doi:10.3389/fpls.2021.580846)
Supplement: Supplementary Table 1 — Statistical table of sequencing in different bulks. [file Table_1.XLSX]

## Sheet: Sheet1
Sample	All Reads	Total bases	Uniq Read Map	Coverage	Depth	SNPs
TLL-L	121519676	18227951400	0.6921	0.9857	52.08	580091
TLL-S	124032266	18604839900	0.707	0.9856	53.16	582745
TLW-W	127961366	19194204900	0.7571	0.9859	54.84	605167
TLW-N	120295522	18044328300	0.7084	0.9855	51.56	585644
SLL-L	123472918	18520937700	0.706	0.9858	52.92	587976
SLL-S	118170232	17725534800	0.769	0.9857	50.64	587264
SLW-W	121852830	18277924500	0.6905	0.9857	52.22	584329
SLW-N	120478184	18071727600	0.7023	0.9857	51.63	584571
Zhongzhi1No.13	96122878	9131673410	0.8193	0.9856	26.09	147065
ZZM2289	46240582	4161652380	0.6979	0.9517	11.89	372329
