# Supplementary material for: QTL-Seq and Transcriptome Analysis Disclose Major QTL and Candidate Genes Controlling Leaf Size in Sesame (Sesamum indicum L.)
Source: Front Plant Sci. 2021 Feb 24;12:580846. doi: 10.3389/fpls.2021.580846 (PMC7943740; doi:10.3389/fpls.2021.580846)
Supplement: Supplementary Table 2 — Number of SNPs in candidate regions detected by QTL-seq. [file Table_2.XLSX]

## Sheet: Sheet1
	SLL	SLW	TLL	TLW
SNPs in candidate regions	200031	207448	210336	205387
Missense variant SNP in candidate regions	192	345	283	643
Missense variant SNP in qSL15-1	6	6	6	6
