# Supplementary material for: QTL-Seq and Transcriptome Analysis Disclose Major QTL and Candidate Genes Controlling Leaf Size in Sesame (Sesamum indicum L.)
Source: Front Plant Sci. 2021 Feb 24;12:580846. doi: 10.3389/fpls.2021.580846 (PMC7943740; doi:10.3389/fpls.2021.580846)
Supplement: Supplementary Table 3 — The information of the 71 SSR markers. [file Table_3.XLSX]

## Sheet: Sheet1
Table S3.The information of the 71 SSR markers.
Marker	Linkage group		Forward sequence	Reverse sequence	Annealing temperature (°C)	Product size (bp)
ZMM6151	LG2	0	CAAATCCGATCCAAATACCG	TGAAAATAGCAACGGTACACGA	60	253
ZMM3937	LG2	2.623	CTTCAAGAATGAATGGCGCT	TTGGGGAAAACTGTCTGAAAA	60	249
ZMM6160	LG2	19.815	TTATTTGTAGCGTGATAACAATATGAT	CCCAAGATCGAGCCATAAAA	60	233
ZMM6048	LG2	22.886	GAGCAATTGATGCGAAGAAA	ACGAGTCCACAAACCAGACC	60	148
ZMM3068	LG3	0	AGCATAAGGGGCAGTGCTTA	TCCCTTCACCATACTTATTCCA	60	265
ZMM5925	LG3	2.033	CATAGCCGGCCCTAGGTTAT	ATCTTTCTGCTGGTTGCAGG	60	247
ZMM3073	LG3	3.221	CGGTTCGATTGCATTCTCTT	GCAGAACCCATCTCCTTCAA	60	191
ZMM3070	LG3	4.852	GAGTAATTACACATCTACCCTTCAAA	GCACAACAAACACAATATCCCA	60	175
ZMM5893	LG3	11.158	TTGGCTTCGGGTAGAGAGAA	CCGTGAAGATCTCGAGAAGG	60	189
ZMM5922	LG3	18.203	ACAAGGAGAATGTGGGTTGC	GAACAAATTGTGAAATCTTGGAAA	60	259
ZMM5926	LG3	20.845	TGGGTCATGAGTTCTGCAAG	TTGTGTATCGATGGTGCGTT	60	218
ZMM5920	LG3	23.297	ACGCATCAAGTCGAAAGCTC	TTCTCCCAAAAGGGTCAAAG	60	217
ZMM5802	LG3	24.846	TATCTTTCTTGCGCTGTCCC	TTTCTCGGTAGGAATTCGTTG	60	227
ZMM5918	LG3	26.602	CATTTGGTTATTTATTCCTCAGCA	CATTGGTGCTAACTTGGGGT	60	166
ZMM5909	LG3	28.276	CCTCGAGGAGGATAGTGCAA	TTCATTCAATGTACCAAAAGCG	60	233
ZMM1033	LG3	30.226	CGTAGTGGTTCCCCTCACAT	ATGCTTTCCCCCAAATAACC	60	179
ZMM5854	LG3	35.734	CGGGATTTGTGTTCTTGCTC	AAATCCACTGGGATCAGCAT	60	254
ZMM5814	LG3	43.977	ATTGCAAACACCCTTTCGTC	GTTGTTGTGCCATGGAGTTG	60	235
ZMM5812	LG3	46.136	GCAGAAGAACATTTGCCCTC	TCCCAGAAACATCTGAGCAA	60	242
ZMM2218	LG3	49.133	GATGGGGAAAGAGATTGGGT	ATTGAATCGACGTAATTTATCCTT	60	259
ZMM5621	LG3	56.969	CCTTCTGGAACAAGGCAAGA	TTAACGGCGAAATAACGACC	60	221
ZMM5461	LG3	65.635	AAATGGTGGAATTTGCTTGC	AGACCACCCTCTTCAAGGCT	60	273
ZMM4980	LG4	0	AATGCTAATCCCCCAATTCC	TTGACAAAAGATATCCGGTCC	60	202
ZMM4977	LG4	6.555	TGCCTATAAGCTTTCGCGTT	TTTTTGCCCTTGAAAAGGTG	60	258
ZMM4689	LG6	0	CCACCTTTTAACCCCAATCA	TGAGGGTTTGAATCCGTCTC	60	159
ZMM2202	LG6	13.338	TCAGGAAGAAAGAATTGCTGC	CAACCCAACCATCCTGACTC	60	276
ZMM4687	LG6	21.239	TGTCGCTCCCGTACTTCTCT	TGCGAATGACTTGATTCGATAA	60	168
ZMM4686	LG6	28.72	CCCTGTTGCATTAGTGGCTT	TATGCCCAATCGTCAAACCT	60	255
ZMM1682	LG8	0	ACGCCTTTTGATGCAGAGTT	AAGCCCGCTGATGAATACAC	60	156
ZMM5657	LG8	27.988	CCTTTTCACCACCACTCTCC	ATCACCACCCTCTGTGCTTC	60	268
ZMM3186	LG9	0	GGCCGACACACTTTATTTTGA	TGAACAGATCTCCAGCCGAT	60	236
ZMM1201	LG9	7.139	TTTTCTCCTATTGCGCTCGT	GGACCCCAACAACAGCTAAA	60	264
ZMM1203	LG9	3.882	TTAGGGCCTAGGGTACGGAT	TGCATCACTTTGTGGAGTGG	60	256
ZMM1206	LG9	10.474	CACCACCCCATTGGACTAAC	GAGAAGGGGATTTTGCTGTG	60	229
ZMM1585	LG10	0	AAGATTAGATGCGCCCTCAA	GTCAATTCCCTTGTCCGAAA	60	150
ZMM1451	LG10	16.934	CCAACAAGATGGAATGTCCC	AGGACAAGTCAATGGATGAAAA	60	263
ZMM3461	LG10	21.967	AACAATAGAAATAGCCTCGGTCA	CGATCCAACATGGTTGTTTGT	60	272
ZMM4699	LG11	0	GTGAGCTAAACACGGCTGGT	GCAAAGGAGGACCAACTTTTT	60	199
ZMM4698	LG11	12.689	GGTTGTCCTCTTCCAACACTTC	TGCAATATCACAAGGGGGTT	60	161
ZMM1813	LG11	16.396	GCAGCCACCCAACAAATAAT	TCGTCAGAACTCGTTAGGACAT	60	183
ZMM1809	LG11	19.245	TTAAGCCTCGTTGACTCCAA	ATTGTACGGCATGTTGTCCC	60	256
ZMM1812	LG11	20.371	GGAGTTGCGAGAATCCATAAA	TCGTCTCATTGTCATCAGCC	60	188
ZMM6086	LG11	50.02	TGGAGATATTGAACTCAATGCAAG	AAACTACCCTGCCACCTTCA	60	247
ZMM6093	LG11	55.873	GCAGTTTGAAGGGTTTTCCA	TTGCTCTTAATTCTTCCCACG	60	273
ZMM6094	LG11	77.745	ACCATTTGTTGTGGGGTAGG	ATCTCAATTTGATGCTCGCC	60	270
ZMM2209	LG3	0	ATCTCCCGGGTATTTCAAGC	TGACCAAACAAATTCAGACAGA	60	141
ZMM5611	LG3	3.738	GGTAGTGAAGGTGGGCAGAC	GTGCGAACTCAATGCACACT	60	264
ZMM6122	LG13	18.115	CCTAAGGATTTCTGAGGGGC	GCCATCATTGGATAGAAACCA	60	234
ZMM6127	LG13	41.155	TCCCATGTCCAAGATTATTGC	TGGATCCGAAGCTGCTCTAT	60	191
ZMM6126	LG13	41.713	AAAAGACTGGTGGAGGTGGA	TCCCAATGTCACGTGTTTGT	60	218
ZMM6124	LG13	41.811	CCCTCACACCAAAACTCCAT	CCGAGTGATGAACACACACA	60	201
ZMM6125	LG13	42.311	CGATAATTATGCTAAATTTTGTTTTTC	TTTGCAGGTGCCCTCTTTAG	60	259
ZMM3245	LG15	0	TTTTCATAACACAAGTAGGTAGATTGC	TGGTGTGGGTACGTAGTCATGT	60	278
ZMM1363	LG15	10.625	CAATGGATAAGGAGGCGAAA	ATCGGTCATTCCAATCCTCA	60	262
ZMM1368	LG15	16.933	TCCATCGATGCTGGACTGTA	CAAGTTAAATATATGCTGTACATGTGG	60	246
ZMM6033	LG15	25.3	TCAGGAGGCCCTACCCTAAT	CTGCTGGCAAAAACCCTTTA	60	135
ZMM6185	LG15	31.17	GGCAAATGTCACCTGCCTAT	GAGGAAAGGGAAGTTCTCCG	60	229
ZMM6206	LG15	33.332	TTGGTAGGAGGAAAACAAATGAA	ATTTCTGTGATGGCGTGTGA	60	234
ZMM3195	LG15	36.123	TTGAGGATTTCAGTCTGATCG	CCGAAATTGGATTCTCCTGA	60	221
ZMM6174	LG15	37.607	TGTGTGTGCTTTTTGCCAGT	GTTGCGGGCTGTAATGTTG	60	278
ZMM1675	LG15	42.347	TGTCCATGGGACAACCTTTT	TTGAATTGCTTGGCTGAGAA	60	238
ZMM5997	LG15	43.892	AAGCCCCACATCGTTGATAG	GAAAAAGTGTCGGTGGGTTG	60	246
ZMM6015	LG15	44.664	TCGTGAGAAATAAATGTGGTGG	ACAACATTCTGCCCTCCATC	60	235
ZMM6021	LG15	47.764	AACCATCTCAGCCTGCAACT	TCTGCTAACCAAGTGCATCG	60	225
ZMM1668	LG15	49.088	CATGATCAGATGCAACATCAA	CTCTGCCAGCTAACAATCCC	60	187
ZMM6035	LG15	58.346	CCAAGTACAGCGCAGAATGA	CACCGGAAAACAGTAGGGAA	60	268
ZMM6001	LG15	67.703	GGAGCTTCGGAGAAAAAGGT	GGACTGATCAGCTGGAATACG	60	234
ZMM2897	LG16	0	GGGCAAAATTAGCAACGAAA	TGGGGATAATTACGTCTATACCTC	60	272
ZMM6141	LG16	2.24	AAAAAGCAAAATCCATAATTTGA	TTGCCCCCTCAACTATTTTG	60	167
ZMM6142	LG16	3.746	TACGAACACGCTTTGCTCAC	TGATCACAACACTCTCCCAAA	60	148
ZMM2896	LG16	7.132	GGCGTTTTTCACTTTAATCCC	GGCTAATTTTGCAATTTTTCCA	60	272
