# Supplementary material for: QTL-Seq and Transcriptome Analysis Disclose Major QTL and Candidate Genes Controlling Leaf Size in Sesame (Sesamum indicum L.)
Source: Front Plant Sci. 2021 Feb 24;12:580846. doi: 10.3389/fpls.2021.580846 (PMC7943740; doi:10.3389/fpls.2021.580846)
Supplement: Supplementary Table 4 — Candidate genes in the qLS15-1. [file Table_4.XLSX]

## Sheet: Sheet2
Candidate genes in the qLS15-1
GeneID	Start	End	annotation	Chro	swissprot	trembl	kegg	IPR	GO
SIN_1004866	20403237	20405948	LIPLESS1	LG15	AP2_ARATH Floral homeotic protein APETALA 2 OS=Arabidopsis thaliana GN=AP2 PE=1 SV=1	Q84U24_ANTMA LIPLESS1 OS=Antirrhinum majus GN=lip1 PE=2 SV=1	AP2; transcription factor APETALA2; K09284 AP2-like factor, euAP2 lineage	IPR001471; Pathogenesis-related transcriptional factor/ERF, DNA-binding	GO:0003700; sequence-specific DNA binding transcription factor activity; Molecular Function GO:0006355; regulation of transcription, DNA-dependent; Biological Process
SIN_1004867	20386966	20389578	Uncharacterized protein	LG15	CBSX2_ARATH CBS domain-containing protein CBSX2, chloroplastic OS=Arabidopsis thaliana GN=CBSX2 PE=1 SV=1	NA (bescause of database update)	NA	IPR000644; Cystathionine beta-synthase, core	GO:0005515; protein binding; Molecular Function
SIN_1004868	20383995	20384465	Uncharacterized protein	LG15	CBSX2_ARATH CBS domain-containing protein CBSX2, chloroplastic OS=Arabidopsis thaliana GN=CBSX2 PE=1 SV=1	B9T7X1_RICCO Putative uncharacterized protein OS=Ricinus communis GN=RCOM_0320290 PE=4 SV=1	NA	IPR000644; Cystathionine beta-synthase, core	GO:0005515; protein binding; Molecular Function
SIN_1004870	20371596	20374557	Nucleotide-binding, alpha-beta plait	LG15	SCW1_SCHPO Cell wall integrity protein scw1 OS=Schizosaccharomyces pombe (strain ATCC 38366 / 972) GN=scw1 PE=1 SV=1	D7SVT4_VITVI Whole genome shotgun sequence of line PN40024, scaffold_31.assembly12x (Fragment) OS=Vitis vinifera GN=VIT_00022075001 PE=4 SV=1	NA	IPR000504; RNA recognition motif domain	GO:0003676; nucleic acid binding; Molecular Function
SIN_1004871	20365595	20368965	Uncharacterized protein	LG15	SCE1_ARATH SUMO-conjugating enzyme SCE1 OS=Arabidopsis thaliana GN=SCE1 PE=1 SV=1	C6T174_SOYBN Ubiquitin carrier protein OS=Glycine max PE=2 SV=1	hypothetical protein LOC100242395; K10577 ubiquitin-conjugating enzyme E2 I [EC:6.3.2.19]	IPR000608; Ubiquitin-conjugating enzyme, E2 IPR023313; Ubiquitin-conjugating enzyme, active site	GO:0016881; acid-amino acid ligase activity; Molecular Function GO:0043687; post-translational protein modification; Biological Process
SIN_1004875	20335472	20339191	Uncharacterized protein	LG15	B3GA1_HUMAN Galactosylgalactosylxylosylprotein 3-beta-glucuronosyltransferase 1 OS=Homo sapiens GN=B3GAT1 PE=1 SV=2	Q50HU7_SOLTU Glycosyltransferase OS=Solanum tuberosum GN=pglcat8 PE=2 SV=1	hypothetical protein LOC100248926; K10158 galactosylgalactosylxylosylprotein 3-beta-glucuronosyltransferase 3 [EC:2.4.1.135]	IPR005027; Glycosyl transferase, family 43	GO:0015018; galactosylgalactosylxylosylprotein 3-beta-glucuronosyltransferase activity; Molecular Function GO:0016020; membrane; Cellular Component
SIN_1004876	20332552	20334916	Uncharacterized protein	LG15	Y3720_ARATH UPF0481 protein At3g47200 OS=Arabidopsis thaliana GN=At3g47200 PE=1 SV=1	A5BCN4_VITVI Putative uncharacterized protein OS=Vitis vinifera GN=VITISV_038869 PE=4 SV=1	NA	IPR004158; Protein of unknown function DUF247, plant	NA
SIN_1004877	20323313	20329782	Uncharacterized protein	LG15	PTEN_MOUSE Phosphatidylinositol-3,4,5-trisphosphate 3-phosphatase and dual-specificity protein phosphatase PTEN OS=Mus musculus GN=Pten PE=1 SV=1	B9SFZ6_RICCO Phosphatidylinositol-3,4,5-trisphosphate 3-phosphatase and dual-specificity protein phosphatase PTEN, putative OS=Ricinus communis GN=RCOM_1153030 PE=4 SV=1	Phosphatidylinositol-3,4,5-trisphosphate 3-phosphatase and dual-specificity protein phosphatase PTEN, putative (EC:3.1.3.67); K01110 phosphatidylinositol-3,4,5-trisphosphate 3-phosphatase [EC:3.1.3.67]	IPR014019; Phosphatase tensin type IPR014020; Tensin phosphatase, C2 domain IPR016130; Protein-tyrosine phosphatase, active site	GO:0004725; protein tyrosine phosphatase activity; Molecular Function GO:0005515; protein binding; Molecular Function GO:0016311; dephosphorylation; Biological Process GO:0016791; phosphatase activity; Molecular Function
SIN_1004879	20302535	20307982	Kinesin-like protein	LG15	KIF22_HUMAN Kinesin-like protein KIF22 OS=Homo sapiens GN=KIF22 PE=1 SV=5	B9IDA2_POPTR Predicted protein OS=Populus trichocarpa GN=POPTRDRAFT_575840 PE=3 SV=1	Osmotic avoidance abnormal protein, putative; K10403 kinesin family member 22	IPR001752; Kinesin, motor domain	GO:0003777; microtubule motor activity; Molecular Function GO:0005524; ATP binding; Molecular Function GO:0007018; microtubule-based movement; Biological Process
SIN_1004880	20296163	20296816	Uncharacterized protein	LG15	PUB32_ARATH U-box domain-containing protein 32 OS=Arabidopsis thaliana GN=PUB32 PE=2 SV=1	D7UCB8_VITVI Whole genome shotgun sequence of line PN40024, scaffold_46.assembly12x (Fragment) OS=Vitis vinifera GN=VIT_00026936001 PE=4 SV=1	leucine-rich repeat family protein / protein kinase family protein; K00924 [EC:2.7.1.-]	IPR000719; Protein kinase, catalytic domain IPR001245; Serine-threonine/tyrosine-protein kinase	GO:0004672; protein kinase activity; Molecular Function GO:0005524; ATP binding; Molecular Function GO:0006468; protein phosphorylation; Biological Process
SIN_1004882	20258327	20260883	Cyclin D	LG15	CCD32_ARATH Cyclin-D3-2 OS=Arabidopsis thaliana GN=CYCD3-2 PE=2 SV=1	Q4JF76_SCUBA Cyclin D OS=Scutellaria baicalensis PE=2 SV=1	hypothetical protein LOC100267897; K14505 cyclin D3, plant	IPR004367; Cyclin, C-terminal IPR006670; Cyclin IPR006671; Cyclin, N-terminal	GO:0005634; nucleus; Cellular Component
SIN_1004883	20252718	20255114	Uncharacterized protein	LG15	ARF1_ORYSJ ADP-ribosylation factor 1 OS=Oryza sativa subsp. japonica GN=Os01g0813400 PE=2 SV=3	B9SG01_RICCO ADP-ribosylation factor, arf, putative OS=Ricinus communis GN=RCOM_1153480 PE=3 SV=1	ATARFA1B (ADP-ribosylation factor A1B); GTP binding / phospholipase activator/ protein binding; K07977 Arf/Sar family, other	IPR003579; Ras small GTPase, Rab type IPR006687; Small GTPase SAR1-type IPR006688; ADP-ribosylation factor IPR006689; ARF/SAR superfamily	GO:0005525; GTP binding; Molecular Function GO:0005622; intracellular; Cellular Component GO:0006886; intracellular protein transport; Biological Process GO:0007264; small GTPase mediated signal transduction; Biological Process GO:0015031; protein transport; Biological Process
SIN_1004886	20234828	20236770	Uncharacterized protein	LG15	YAM3_SCHPO UPF0673 membrane protein C1F5.03c OS=Schizosaccharomyces pombe (strain ATCC 38366 / 972) GN=SPAC1F5.03c PE=2 SV=1	B9H462_POPTR Predicted protein OS=Populus trichocarpa GN=POPTRDRAFT_558391 PE=4 SV=1	hypothetical protein; K12846 U4/U6.U5 tri-snRNP-associated protein 3	IPR006076; FAD dependent oxidoreductase	GO:0016491; oxidoreductase activity; Molecular Function
SIN_1004887	20231788	20234495	Uncharacterized protein	LG15	NA	A9PCC5_POPTR Predicted protein OS=Populus trichocarpa GN=POPTRDRAFT_556174 PE=2 SV=1	NA	IPR010683; Protein of unknown function DUF1262	NA
SIN_1004890	20219633	20223089	Uncharacterized protein	LG15	FTSH_THET1 ATP-dependent zinc metalloprotease FtsH OS=Thermobaculum terrenum (strain ATCC BAA-798 / YNP1) GN=ftsH PE=3 SV=1	B9H3T2_POPTR Predicted protein OS=Populus trichocarpa GN=POPTRDRAFT_556179 PE=3 SV=1	hypothetical protein; K03798 cell division protease FtsH [EC:3.4.24.-]	IPR003593; ATPase, AAA+ type, core IPR003959; ATPase, AAA-type, core IPR003960; ATPase, AAA-type, conserved site IPR011546; Peptidase M41, FtsH extracellular	GO:0000166; nucleotide binding; Molecular Function GO:0004222; metalloendopeptidase activity; Molecular Function GO:0005524; ATP binding; Molecular Function GO:0008270; zinc ion binding; Molecular Function GO:0016021; integral to membrane; Cellular Component GO:0017111; nucleoside-triphosphatase activity; Molecular Function
SIN_1004894	20204243	20206889	Uncharacterized protein	LG15	PP208_ARATH Pentatricopeptide repeat-containing protein At3g02490, mitochondrial OS=Arabidopsis thaliana GN=At3g02490 PE=2 SV=1	A5BJC7_VITVI Putative uncharacterized protein OS=Vitis vinifera GN=VITISV_003195 PE=4 SV=1	NA	IPR002885; Pentatricopeptide repeat	NA
SIN_1004896	20191029	20192907	Constans-like protein	LG15	COL2_ARATH Zinc finger protein CONSTANS-LIKE 2 OS=Arabidopsis thaliana GN=COL2 PE=1 SV=1	Q6R3R2_POPDE CONSTANS-like protein CO1 OS=Populus deltoides PE=2 SV=1	CO; CO (CONSTANS); transcription factor/ transcription regulator/ zinc ion binding; K12135 zinc finger protein CONSTANS	IPR000315; Zinc finger, B-box IPR010402; CCT domain	GO:0005515; protein binding; Molecular Function GO:0005622; intracellular; Cellular Component GO:0008270; zinc ion binding; Molecular Function
SIN_1004897	20185448	20185774	Uncharacterized protein	LG15	NA	B9N1W8_POPTR Predicted protein OS=Populus trichocarpa GN=POPTRDRAFT_784147 PE=4 SV=1	NA	NA	NA
SIN_1004898	20181974	20182279	Uncharacterized protein	LG15	NA	B9SXU5_RICCO Putative uncharacterized protein OS=Ricinus communis GN=RCOM_0877550 PE=4 SV=1	NA	NA	NA
SIN_1004899	20175811	20179259	6-phosphogluconate dehydrogenase, decarboxylating	LG15	6PGD_SYNE7 6-phosphogluconate dehydrogenase, decarboxylating OS=Synechococcus elongatus (strain PCC 7942) GN=gnd PE=1 SV=4	B9SXT4_RICCO 6-phosphogluconate dehydrogenase, decarboxylating OS=Ricinus communis GN=RCOM_0876630 PE=3 SV=1	6-phosphogluconate dehydrogenase, putative (EC:1.1.1.44); K00033 6-phosphogluconate dehydrogenase [EC:1.1.1.44]	IPR006114; 6-phosphogluconate dehydrogenase, C-terminal IPR006115; 6-phosphogluconate dehydrogenase, NAD-binding	GO:0004616; phosphogluconate dehydrogenase (decarboxylating) activity; Molecular Function GO:0006098; pentose-phosphate shunt; Biological Process GO:0050661; NADP or NADPH binding; Molecular Function GO:0055114; oxidation-reduction process; Biological Process
SIN_1004903	20151051	20153717	Uncharacterized protein	LG15	PP207_ARATH Pentatricopeptide repeat-containing protein At3g02330 OS=Arabidopsis thaliana GN=PCMP-E90 PE=2 SV=2	B9N7P6_POPTR Predicted protein OS=Populus trichocarpa GN=POPTRDRAFT_931715 PE=4 SV=1	Cell division protein ftsH, putative (EC:3.6.4.3); K03798 cell division protease FtsH [EC:3.4.24.-]	IPR002885; Pentatricopeptide repeat	NA
SIN_1004906	20126360	20130335	Uncharacterized protein	LG15	S38A3_HUMAN Sodium-coupled neutral amino acid transporter 3 OS=Homo sapiens GN=SLC38A3 PE=2 SV=1	B9T738_RICCO Amino acid transporter, putative OS=Ricinus communis GN=RCOM_0012320 PE=4 SV=1	amino acid transporter, putative; K14207 solute carrier family 38 (sodium-coupled neutral amino acid transporter), member 2	IPR013057; Amino acid transporter, transmembrane	NA
SIN_1004913	20083619	20086486	Uncharacterized protein	LG15	Y5157_ARATH Probable leucine-rich repeat receptor-like serine/threonine-protein kinase At5g15730 OS=Arabidopsis thaliana GN=At5g15730 PE=2 SV=1	B9SIY3_RICCO Serine/threonine-protein kinase PBS1, putative OS=Ricinus communis GN=RCOM_0791560 PE=4 SV=1	hypothetical protein; K13430 serine/threonine-protein kinase PBS1 [EC:2.7.11.1]	IPR000719; Protein kinase, catalytic domain IPR001245; Serine-threonine/tyrosine-protein kinase IPR002290; Serine/threonine-protein kinase domain IPR008271; Serine/threonine-protein kinase, active site IPR020635; Tyrosine-protein kinase, catalytic domain	GO:0004672; protein kinase activity; Molecular Function GO:0004674; protein serine/threonine kinase activity; Molecular Function GO:0005524; ATP binding; Molecular Function GO:0006468; protein phosphorylation; Biological Process
SIN_1004916	20051410	20069742	Uncharacterized protein	LG15	UBR4_HUMAN E3 ubiquitin-protein ligase UBR4 OS=Homo sapiens GN=UBR4 PE=1 SV=1	D7KZF0_ARALL Predicted protein OS=Arabidopsis lyrata subsp. lyrata GN=ARALYDRAFT_670952 PE=4 SV=1	BIG; BIG (BIG); binding / ubiquitin-protein ligase/ zinc ion binding; K10691 E3 ubiquitin-protein ligase UBR4 [EC:6.3.2.19]	IPR000433; Zinc finger, ZZ-type IPR003126; Zinc finger, N-recognin IPR013993; Zinc finger, N-recognin, metazoa	GO:0004842; ubiquitin-protein ligase activity; Molecular Function GO:0008270; zinc ion binding; Molecular Function
SIN_1004918	20018938	20019763	Uncharacterized protein	LG15	GSTX6_SOYBN Probable glutathione S-transferase OS=Glycine max GN=HSP26-A PE=2 SV=1	B9HSX9_POPTR Predicted protein OS=Populus trichocarpa GN=POPTRDRAFT_565860 PE=4 SV=1	hypothetical protein; K00799 glutathione S-transferase [EC:2.5.1.18]	IPR004045; Glutathione S-transferase, N-terminal IPR004046; Glutathione S-transferase, C-terminal IPR017933; Glutathione S-transferase/chloride channel, C-terminal	GO:0005515; protein binding; Molecular Function
SIN_1004919	20011450	20017512	Uncharacterized protein	LG15	HERC4_RAT Probable E3 ubiquitin-protein ligase HERC4 OS=Rattus norvegicus GN=Herc4 PE=2 SV=1	B9SIV0_RICCO Protein pim1, putative OS=Ricinus communis GN=RCOM_0790230 PE=4 SV=1	regulator of chromosome condensation (RCC1)-like protein; K11494 RCC1 and BTB domain-containing protein	IPR000408; Regulator of chromosome condensation, RCC1	NA
