# Supplementary material for: QTL-Seq and Transcriptome Analysis Disclose Major QTL and Candidate Genes Controlling Leaf Size in Sesame (Sesamum indicum L.)
Source: Front Plant Sci. 2021 Feb 24;12:580846. doi: 10.3389/fpls.2021.580846 (PMC7943740; doi:10.3389/fpls.2021.580846)
Supplement: Supplementary Table 5 — The primer sequence for qRT-PCR. [file Table_5.XLSX]

## Sheet: Sheet1
Primer	Sequence
SIN-1004896-F	GGTTCCTAATACACTCTAC
SIN-1004896-R	CATCTTCTCCATCAACAG
SIN-1004875-F	GGTTCAGACAGAGCAGAG
SIN-1004875-R	AACATAAGTTGGCGTGATG
SIN-1004872-F	TTGGTGTCCTCTTACTAG
SIN-1004872-R	ATATCGTCCTCACTATCG
SIN-1004885-F	GGGAAAGTTATCGTATCG
SIN-1004885-R	CTCAATAGTGCCAATAAGG
SIN-1004882-F	TAAGTGGATGCTGAAGGT
SIN-1004882-R	GGCTTGTGACGAATCTATC
SIN-1004883-F	GATCATCACTACCATTCC
SIN-1004883-R	TAGATCCTCCTCGTTAAG
SIN-1004888-F	CACTGAGCATACCTTCTA
SIN-1004888-R	GCCATAATCCAACATAGC
SIN-1004900-F	CCTTAGTGAATGCTTATGG
SIN-1004900-R	ATCCTTAACCTCCTTCTC
SIN-1004866-F	CCAACAATACATCAGACC
SIN-1004866-R	GTATCCATCTCTTCTCCAT
SIN-1004886-F	TCTCAGCCTCTCAATAAC
SIN-1004886-R	CCACCTTTAATCCATACTC
SIN_1004293-F	GTTGGTCTCTTTGAGGAC
SIN_1004293-R	CAGCTGGATGTCTTTTGG
